# Supplementary material for: Using sensitivity analyses to understand bistable system behavior
Source: Springer Nature journal article supplement (doi:10.1186/s12859-023-05206-2), 2023-04-06
Supplement: 12859_2023_5206_MOESM1_ESM.pdf [file 12859_2023_5206_MOESM1_ESM.pdf]

## Using sensitivity analyses to understand bistable system behavior

Vandana Sreedharan, Upinder S. Bhalla and Naren Ramakrishnan

### Supplementary Information

#### Chemical reaction network

The chemical equations for smallest bistable system by Wilhelm [1] is shown below:

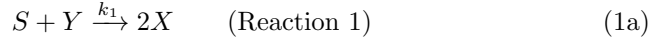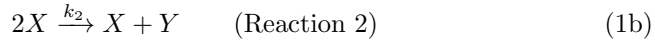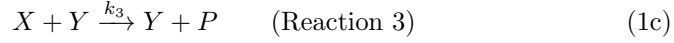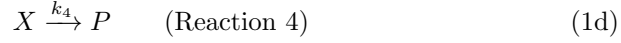

The ODE system to model the dynamics of the above reactions is as follows:

$$\dot{x} = 2k_1y - k_2x^2 - k_3xy - k_4x \quad (2a)$$

$$\dot{y} = k_2x^2 - k_1y \quad (2b)$$

Species S and P are assumed to be constants in this model. S is incorporated in the value of  $k_1$ .

#### Eigenvalue Analysis

For the system in Eq. 2, there are three real and non-negative solutions (or steady states) from solving  $\dot{x} = \dot{y} = 0$ :

- $(x, y) = (0, 0)$
- $(x, y) = \left(\frac{-B \pm \sqrt{D}}{2A}, \frac{k_2x^2}{k_1}\right)$ , where  $B = -\frac{k_1}{k_3}$ ,  $D = \left(\frac{k_1}{k_3}\right)^2 - 4\left(\frac{k_1k_4}{k_3k_2}\right)$ , and  $A = 1$

The system can be linearized about these steady states:

$$\dot{\mathbf{z}} = \mathbf{J}\mathbf{z} \quad (3)$$

where  $\mathbf{z} = [\delta x, \delta y]^T$  and the Jacobian matrix is as follows:

$$\mathbf{J} = \begin{pmatrix} -2k_2x - k_3y - k_4 & 2k_1 - k_3x \\ 2k_2x & -k_1 \end{pmatrix} \quad (4)$$

The eigenvalues  $(\lambda_1, \lambda_2)$  of  $\mathbf{J}$  can then be computed to determine if the steady state is stable, unstable, or a saddle node. Choosing the rate constants  $k_1 = 8$ ,  $k_2 = k_3 = 1$ , and  $k_4 = 1.5$  [1], the results of the above analysis are summarized in Table 1.

Table 1: Summary of eigenvalue analysis on the simplest bistable system [1]

|                                      | Solution 1                                          | Solution 2                                        | Solution 3                                          |
|--------------------------------------|-----------------------------------------------------|---------------------------------------------------|-----------------------------------------------------|
| Steady States $(x, y)$               | (0,0)                                               | (2, 0.5)                                          | (6, 4.5)                                            |
| Jacobian $\mathbf{J}$                | $\begin{pmatrix} -1.5 & 16 \\ 0 & -8 \end{pmatrix}$ | $\begin{pmatrix} -6 & 14 \\ 4 & -8 \end{pmatrix}$ | $\begin{pmatrix} -18 & 10 \\ 12 & -8 \end{pmatrix}$ |
| Eigenvalues $(\lambda_1, \lambda_2)$ | (-1.5, -8)                                          | (-14.5, 0.54)                                     | (-25.04, -0.95)                                     |
| Stability Property                   | Stable                                              | Saddle node                                       | Stable                                              |

There are two stable steady states, which make this system bistable.

### System of ODEs and parameter values for a larger bistable system from [2]

```

da/dt = -1*k1*a + 1*k2*b + 1*k5*d - 2*k9*a^2 + 2*ka*b*c + 1*kb*b^2 - 1*kc*a*c + 1*kf*f
db/dt = 1*k1*a - 1*k2*b - 2*k3*b^2 + 2*k4*d + 1*k5*d - 1*k6*b*c + 1*k7*e + 1*k9*a^2 - 1*ka*b*c - 2*kb*b^2 + 2*kc*a*c - 1*kd*b*c + 1*ke*f + 1*kf*f
dd/dt = + 1*k3*b^2 - 1*k4*d - 1*k5*d
dc/dt = -1*k6*b*c + 1*k7*e + 2*k8*e + 1*k9*a^2 - 1*ka*b*c + 1*kb*b^2 - 1*kc*a*c - 1*kd*b*c + 1*ke*f
de/dt = + 1*k6*b*c - 1*k7*e - 1*k8*e
f = (T0 - (1*a + 1*b + 1*c + 2*d + 2*e))/2

init a = 0.622176
init b = 0.985929
init c = 0.0160937
param T0 = 1.6242
param k1 = 0.163557
param k2 = 1.00155
param k3 = 93.5102
param k4 = 0.842684
param k5 = 0.210671
param k6 = 13.6847
param k7 = 13.5496
param k8 = 3.3874
param k9 = 0.307605
param ka = 0.160697
param kb = 1.11248
param kc = 1.29544
param kd = 0.46286
param ke = 1.16452
param kf = 0.29113

```

Figure 1: ODEs and parameter values for the bistable system in Figure 10. The reactions and parameter values are taken from [2]

### Reference for Supplementary information

## References

- [1] Wilhelm, T.: The smallest chemical reaction system with bistability. *BMC Systems Biology* **3**(1), 90 (2009). doi:10.1186/1752-0509-3-90
- [2] Ramakrishnan, N., Bhalla, U.S.: Memory switches in chemical reaction space. *PLoS computational biology* **4**(7), 1000122 (2008)
